# Supplementary material for: Long-Range PCR-Based NGS Applications to Diagnose Mendelian Retinal Diseases
Source: MDPI journal article supplement (doi:10.3390/ijms22041508), 2021-02-03

**Figure S2. WES spike-in proof of concept.**

Screenshot from the Alamut Visual software showing alignment of different assays for the *ABCA4* (A), *RPGR* (B), and *PCARE* (C) loci. On top, the alignment resulting from a typical WES assay. In the middle, the results of the spike-in of IDT custom capture probes for *ABCA4* are shown (A). On the bottom, the long-range PCR library spike-in results are illustrated.

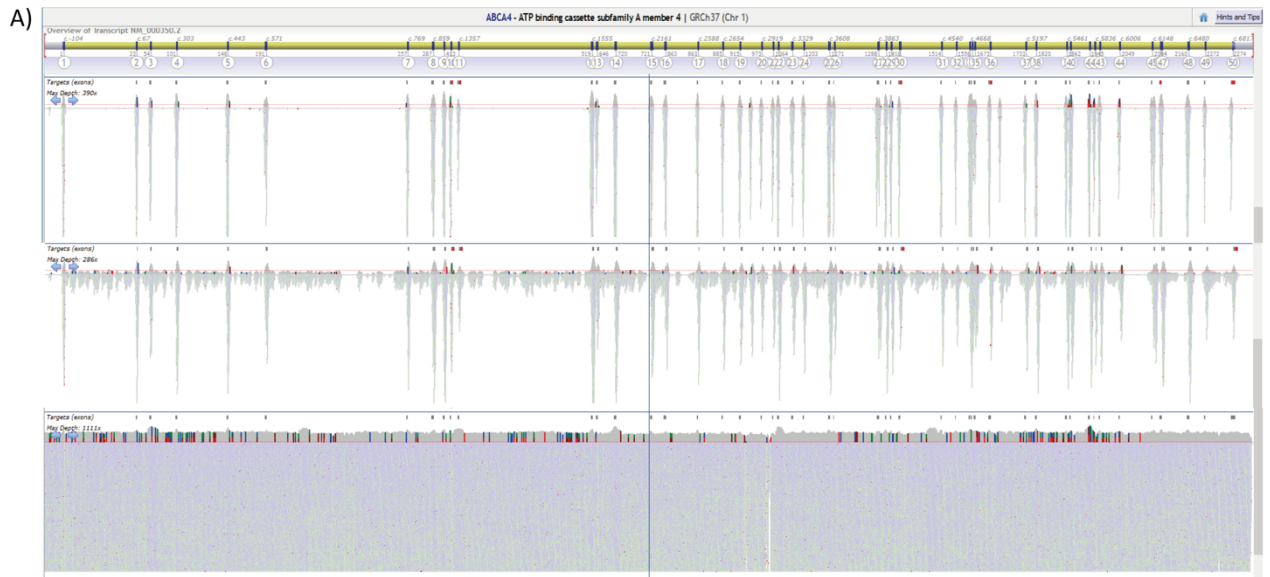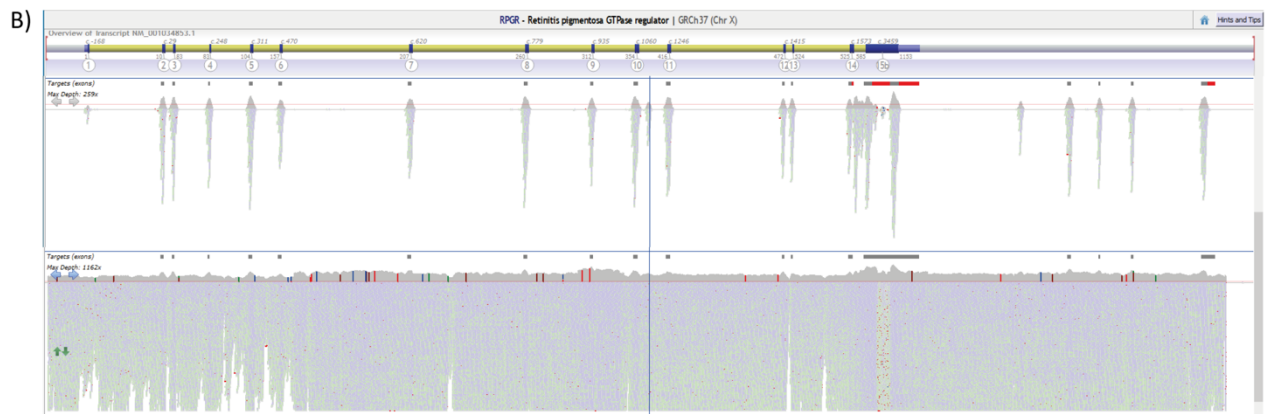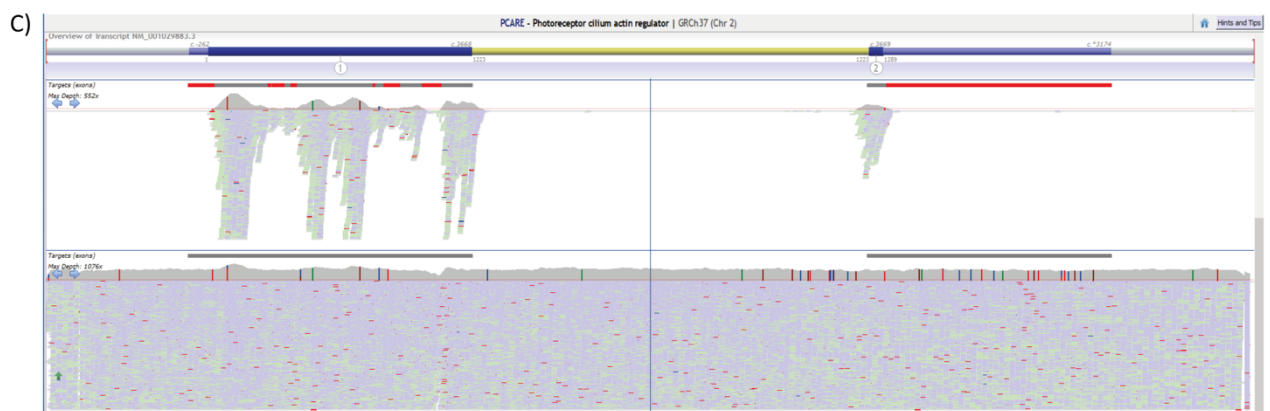

Supplement: s1 [file s1]
